# Supplementary material
Source: PubMed Central journal article supplement (PMC5215049)

Supporting Information:

**Caldoramide, a Modified Pentapeptide from the Marine Cyanobacterium *Caldora penicillata***

Sarath P. Gunasekera, Lorelie Imperial, Christiana Garst, Ranjala Ratnayake, Long H. Dang, Valerie J. Paul, and Hendrik Luesch

Smithsonian Marine Station at Ft. Pierce, 701 Seaway Drive, Ft. Pierce, Florida 34949, USA

Department of Medicinal Chemistry, Center for Natural Products, Drug Discovery and Development (CNPD3), University of Florida, Gainesville, Florida 32610, USA

Department of Medicine, University of Florida, Gainesville, Florida 32610, USA

Contents

|                                                                               | Page # |
|-------------------------------------------------------------------------------|--------|
| <sup>1</sup> H NMR (600 MHz, CDCl <sub>3</sub> ) spectrum of caldoramide (5)  | S 2    |
| <sup>13</sup> C NMR (150 MHz, CDCl <sub>3</sub> ) spectrum of caldoramide (5) | S 3    |
| COSY (600 MHz, CDCl <sub>3</sub> ) spectrum of caldoramide (5)                | S 4    |
| Edited HSQC (600 MHz, CDCl <sub>3</sub> ) spectrum of caldoramide (5)         | S 5    |
| HMBC (600 MHz, CDCl <sub>3</sub> ) spectrum of caldoramide (5)                | S 6    |
| 2D NOESY (600 MHz, CDCl <sub>3</sub> ) spectrum of caldoramide (5)            | S 7    |

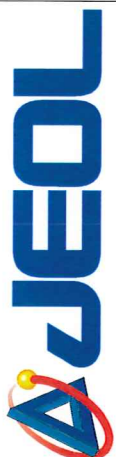

S 2

Caldoramide proton spectrum

---- PROCESSING PARAMETERS ----  
 dc\_balance : 0 : FALSE  
 exp : 0.2[Hz] : 0.0[ms]  
 trapezoid3 : 0[%] : 80[%] : 100[%]  
 zerofill : 1  
 fft : 1 : TRUE : TRUE  
 machinephase  
 ppm

Filename = cg110-3-cdcl3-single\_  
 Author = Smithsonian  
 Experiment = single\_pulse.ex2  
 Sample\_id = cg110-3-cdcl3  
 Solvent = CHLOROFORM-D  
 Creation\_time = 26-JUN-2015 02:59:03  
 Revision\_time = 29-OCT-2015 12:00:53  
 Current\_time = 29-OCT-2015 12:01:29  
 Comment = single\_pulse  
 Data\_format = ID COMPLEX  
 Dim\_size = 13107  
 Dim\_title = IH  
 Dim\_units = [ppm]  
 Dimensions = X  
 Site = ECA 600  
 Spectrometer = ECA600-AID  
 Field\_strength = 14.09636928 [T] (600 [M  
 X\_acq\_duration = 1.4548992 [s]  
 X\_domain = IH  
 X\_freq = 600.1723046 [MHz]  
 X\_offset = 5 [ppm]  
 X\_points = 16384  
 X\_prescans = 1  
 X\_resolution = 0.68733284 [Hz]  
 X\_sweep = 11.26126126 [kHz]  
 Irr\_domain = IH  
 Irr\_freq = 600.1723046 [MHz]  
 Irr\_offset = 5 [ppm]  
 Tri\_domain = IH  
 Tri\_freq = 600.1723046 [MHz]  
 Tri\_offset = 5 [ppm]  
 Clipped = FALSE  
 Mod\_return = 1  
 Scans = 16  
 Total\_scans = 16  
 X\_90\_width = 7.5 [us]  
 X\_acq\_time = 1.4548992 [s]  
 X\_angle = 45 [deg]  
 X\_atn = 2 [dB]  
 X\_pulse = 3.75 [us]  
 Irr\_mode = Off  
 Tri\_mode = Off  
 Dante\_preset = FALSE  
 Initial\_wait = 1 [s]  
 Recvr\_gain = 48  
 Relaxation\_delay = 5 [s]  
 Repetition\_time = 6.4548992 [s]  
 Temp\_get = 24.5 [dC]

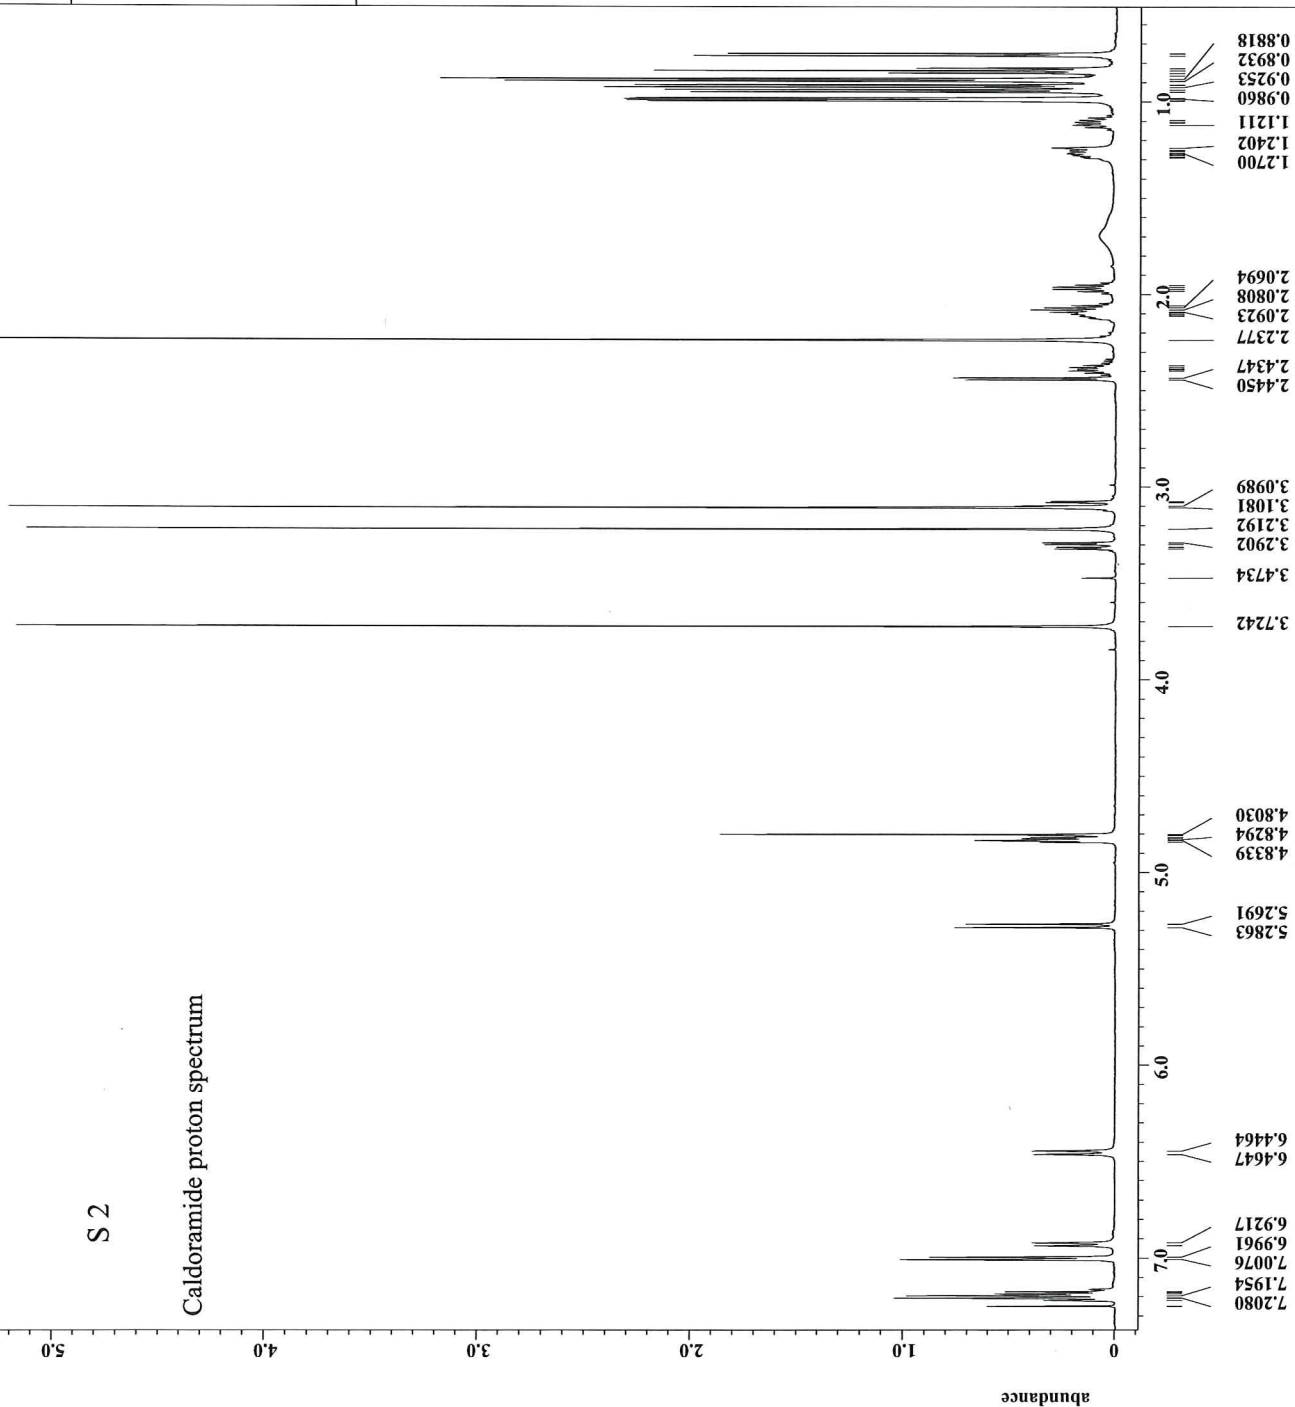

X : parts per Million : 1H

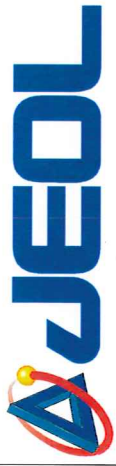

S 3

Caldoamide carbon spectrum

---- PROCESSING PARAMETERS ----  
dc\_balance : 0 : FALSE  
sexp : 2.0[Hz] : 0.0[s]  
trapezoid3 : 0[%] : 80[%] : 100[%]  
zerofill : 1  
fft : 1 : TRUE : TRUE  
machinephase  
ppm

Filename = cg110-3-cdcl3--single\_  
Author = Smithsonian  
Experiment = single\_pulse\_dec  
Sample\_id = cg110-3-cdcl3  
Solvent = CHLOROFORM-D  
Creation\_time = 26-JUN-2015 17:58:15  
Revision\_time = 29-OCT-2015 11:50:18  
Current\_time = 29-OCT-2015 11:50:52  
Comment = single pulse decouple  
Data\_format = 1D COMPLEX  
Dim\_size = 26214  
Dim\_title = 13C  
Dim\_units = [ppm]  
Dimensions = X  
Site = ECA 600  
Spectrometer = ECA600-AID  
Field\_strength = 14.09636928[T] (600[M  
X\_acq\_duration = 0.69206016[s]  
X\_domain = 13C  
X\_freq = 150.91343039 [MHz]  
X\_offset = 100 [ppm]  
X\_points = 32768  
X\_prescans = 4  
X\_resolution = 1.44496109 [Hz]  
X\_sweep = 47.34848485 [kHz]  
Irr\_domain = 1H  
Irr\_freq = 600.1723046 [MHz]  
Irr\_offset = 5 [ppm]  
Clipped = FALSE  
Mod\_return = 1  
Scans = 20000  
Total\_scans = 20000  
X\_90\_width = 14.7 [us]  
X\_acq\_time = 0.69206016 [s]  
X\_angle = 20 [deg]  
X\_atn = 2 [db]  
X\_pulse = 4.9 [us]  
Irr\_atn\_dec = 24 [dB]  
Irr\_atn\_noe = 24 [dB]  
Irr\_noise = WALTZ  
Decoupling = TRUE  
Initial\_wait = 1 [s]  
Noe\_time = TRUE  
Recvr\_gain = 2 [s]  
Relaxation\_delay = 2 [s]  
Repetition\_time = 2.69206016 [s]  
Temp\_get = 24.6 [dC]

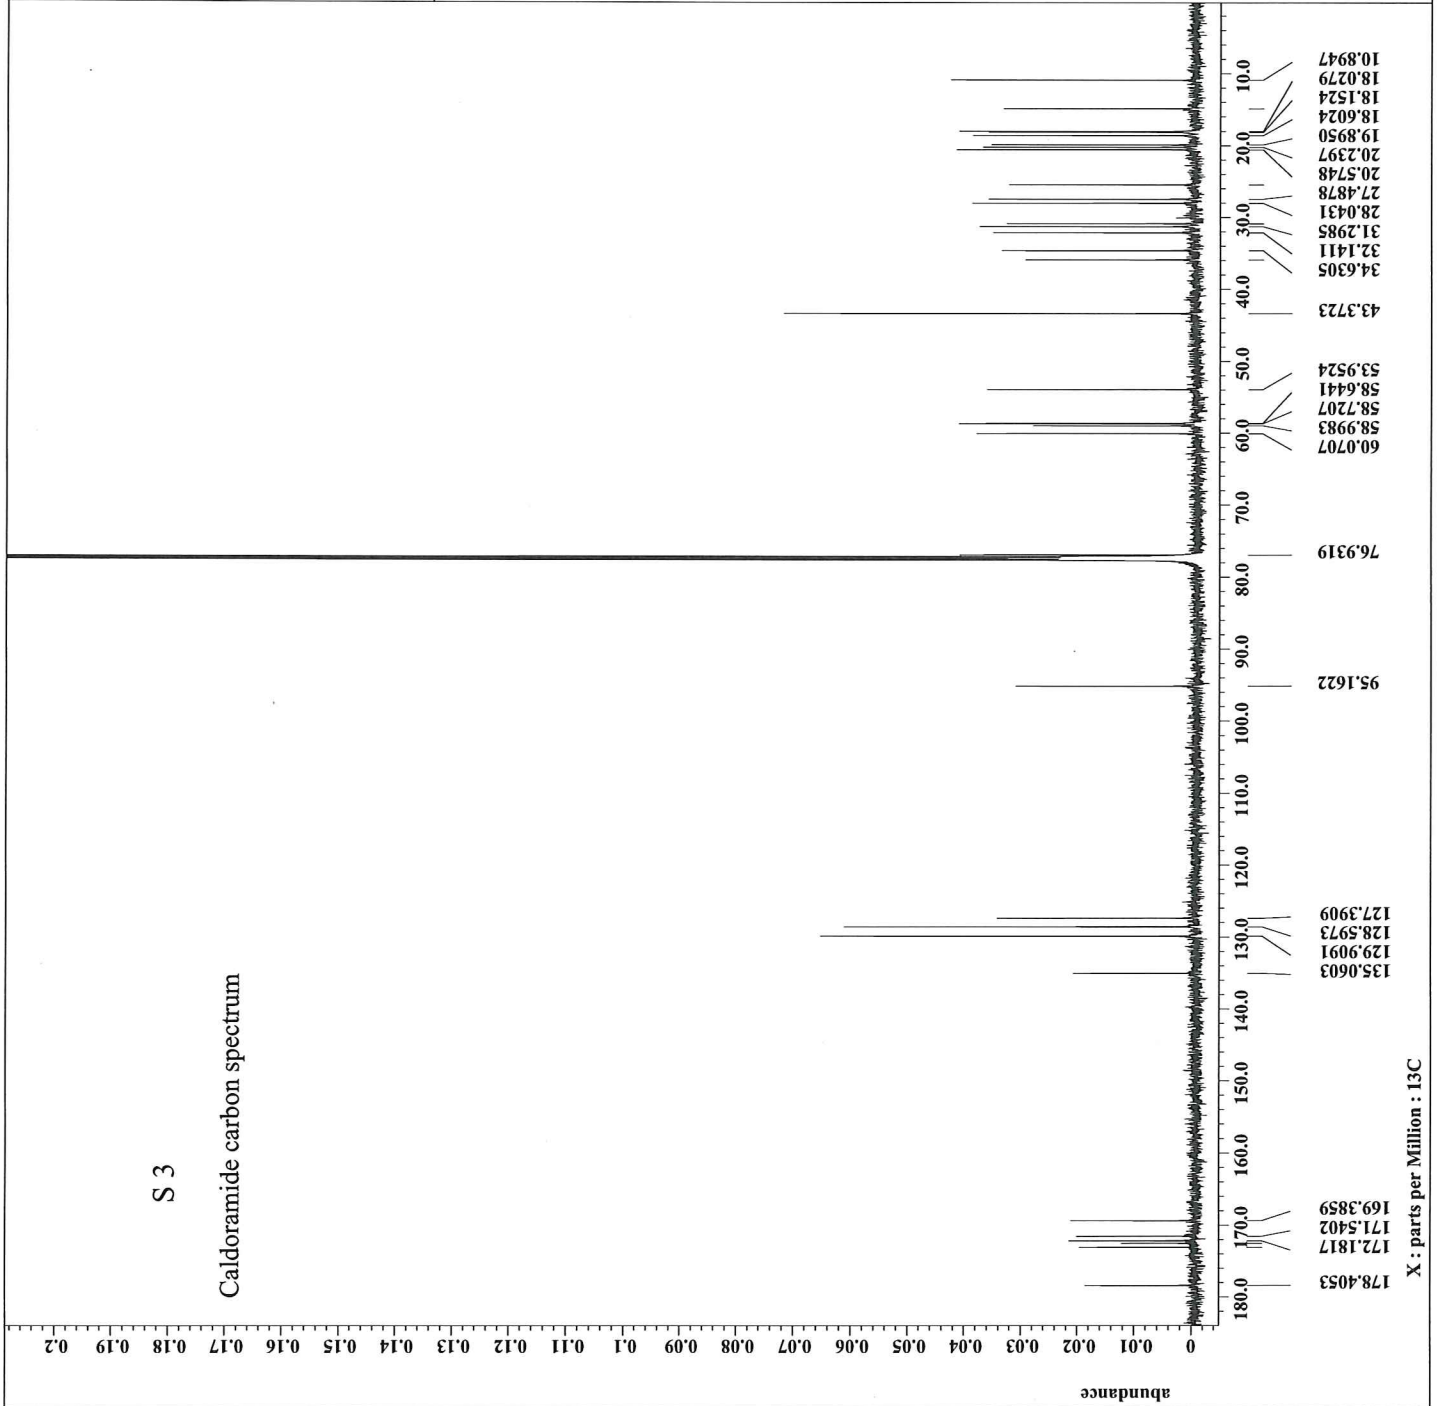

X : parts per Million : 13C

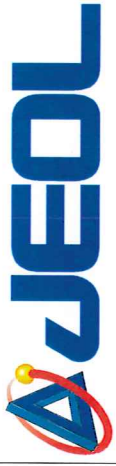

```

---- PROCESSING PARAMETERS ----
sinbell_auto
fft : 1 : TRUE : TRUE
ppm
[transpose]
zerofill : 4
sinbell_auto
fft : 1 : TRUE : TRUE
ppm
abs
thresh : 2 [%] : 1
symmetrize : Cosy : 24
[transpose]
  
```

```

Filename = cgl10-3-cdcl3-dgf_cos
Author = Smithsonian
Experiment = dqf_cosy_pfg.ex2
Sample_id = cgl10-3-cdcl3
Solvent = CHLOROFORM-D
Creation_time = 26-JUN-2015 18:36:08
Revision_time = 29-OCT-2015 11:58:13
Current_time = 29-OCT-2015 11:59:42
Comment = gradient absolute val
Data_format = 2D REAL REAL
Dim_size = 1024, 1024
Dim_title = 1H 1H
Dim_units [ppm] [ppm]
Dimensions = X Y
Site = ECA 600
Spectrometer = ECA600-AID
Field_strength = 14.09636928 [T] (600 [M
X_acq_duration = 0.2333696 [s]
X_domain = 1H
X_freq = 600.1723046 [MHz]
X_offset = 3.99617 [ppm]
X_points = 1280
X_prescans = 4
X_resolution = 4.28504827 [Hz]
X_sweep = 5.48486178 [kHz]
Y_domain = 1H
Y_freq = 600.1723046 [MHz]
Y_offset = 3.99617 [ppm]
Y_points = 256
Y_prescans = 0
Y_resolution = 17.13868901 [Hz]
Y_sweep = 4.38750439 [kHz]
Irr_domain = 1H
Irr_freq = 600.1723046 [MHz]
Irr_offset = 5 [ppm]
Tri_domain = 1H
Tri_freq = 600.1723046 [MHz]
Tri_offset = 5 [ppm]
Clipped = FALSE
Mod_return = 1
Scans = 4
Total_scans = 1024
X_acq_time = 0.2333696 [s]
X_atr = 2 [dB]
X_pulse = 7.5 [us]
X_acq_time = 58.34752 [ms]
Irr_mode = Off
Tri_mode = Off
Dante_preset = FALSE
Grad_1 = 1 [ms]
Grad_1_amp = 60 [mT/m]
  
```

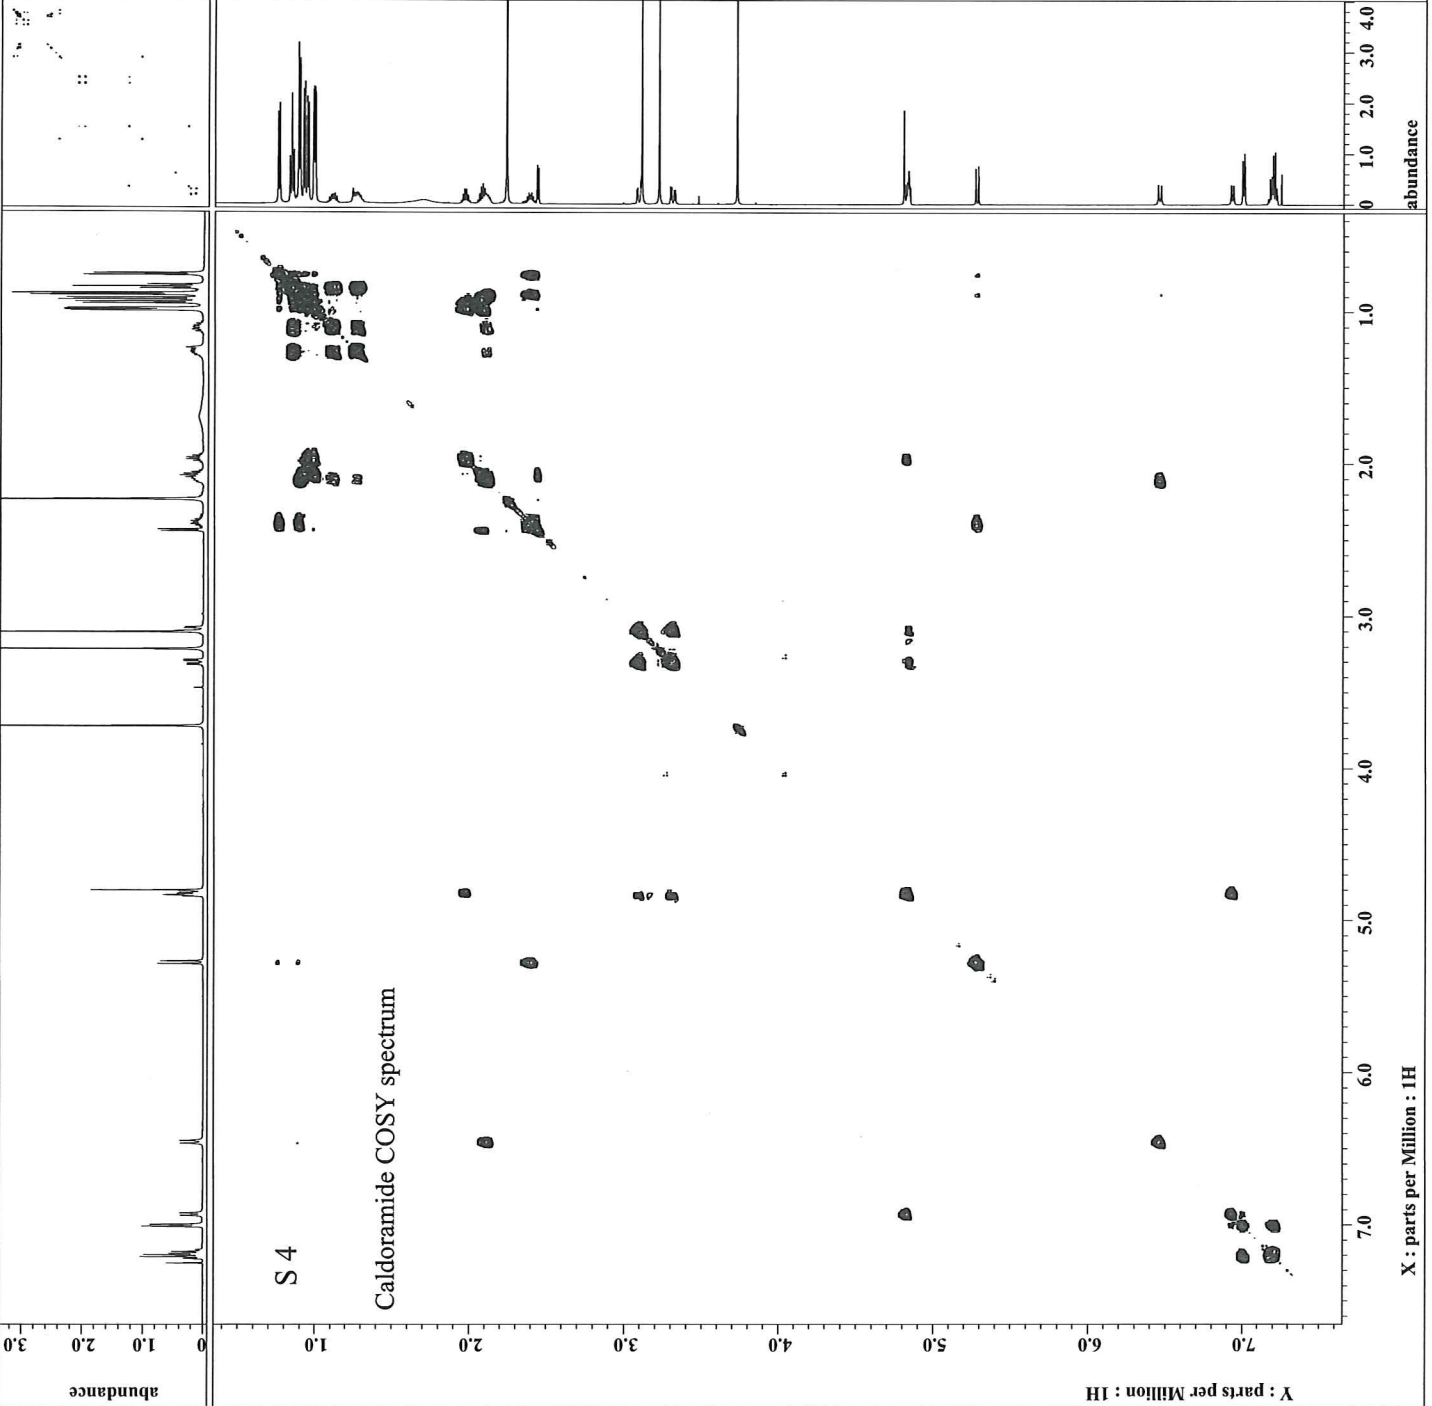

S 4

Caldoramide COSY spectrum

X : parts per Million : 1H

Y : parts per Million : 1H

abundance

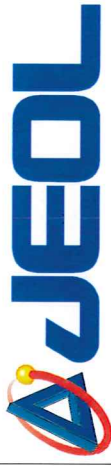

--- PROCESSING PARAMETERS ---  
 sexp : 10.0 [Hz] : 0.0 [s]  
 trapzoid3 : 0 [%] : 80 [%] : 100 [%]  
 zerofill : 1  
 fft : 1 : TRUE : TRUE  
 ppm  
 machinephase  
 phase : 20 : 0 : 3.92711 [ppm]  
 [trapzoid]  
 sexp : 50.0 [Hz] : 0.0 [s]  
 trapzoid3 : 0 [%] : 80 [%] : 100 [%]  
 zerofill : 2  
 fft : 1 : TRUE : TRUE  
 ppm

Filename = cg110-3-cdcl3-hsqc\_ed  
 Author = Smithsonian  
 Experiment = hsqc\_edit\_dec\_ph  
 Sample\_id = cg110-3-cdcl3  
 Solvent = CHLOROFORM-D  
 Creation\_time = 27-JUN-2015 06:43:00  
 Revision\_time = 29-OCT-2015 12:47:11  
 Current\_time = 29-OCT-2015 12:48:30  
 Comment = absorption\_hsqc  
 Data\_format = 2D COMPLEX COMPLEX  
 Dim\_size = 819, 512  
 Dim\_title = 1H 13C  
 Dim\_units = [ppm] [ppm]  
 Dimensions = X Y  
 Site = ECA 600  
 Spectrometer = ECA600-AID  
 Field\_strength = 14.09636928 [T] (600 [M  
 X\_acq\_duration = 0.180224 [s]  
 X\_domain = 1H  
 X\_freq = 600.1723046 [MHz]  
 X\_offset = 3.91786 [ppm]  
 X\_points = 1024  
 X\_prescans = 4  
 X\_resolution = 5.54865057 [Hz]  
 X\_sweep = 5.68181818 [kHz]  
 Y\_domain = 13C  
 Y\_freq = 150.91343039 [MHz]  
 Y\_offset = 95.63986 [ppm]  
 Y\_points = 256  
 Y\_prescans = 0  
 Y\_resolution = 111.99111239 [Hz]  
 Y\_sweep = 28.66972477 [kHz]  
 Tri\_domain = 1H  
 Tri\_freq = 600.1723046 [MHz]  
 Tri\_offset = 5 [ppm]  
 Clipped = TRUE  
 Mod\_return = 1  
 Scans = 16  
 Total\_scans = 4096  
 X\_acq\_time = 0.180224 [s]  
 X\_atn = 2 [dB]  
 X\_pulse = 7.5 [us]  
 Y\_acq\_time = 8.92928 [ms]  
 Y\_atn = 2 [dB]  
 Y\_pl\_correction = 360  
 Y\_pulse = 14.7 [us]  
 Irr\_atn\_dec = 19.5 [dB]  
 Irr\_noise = MPF8  
 Tri\_mode = Off  
 Composite\_pulse = FALSE  
 Dante\_presat = FALSE

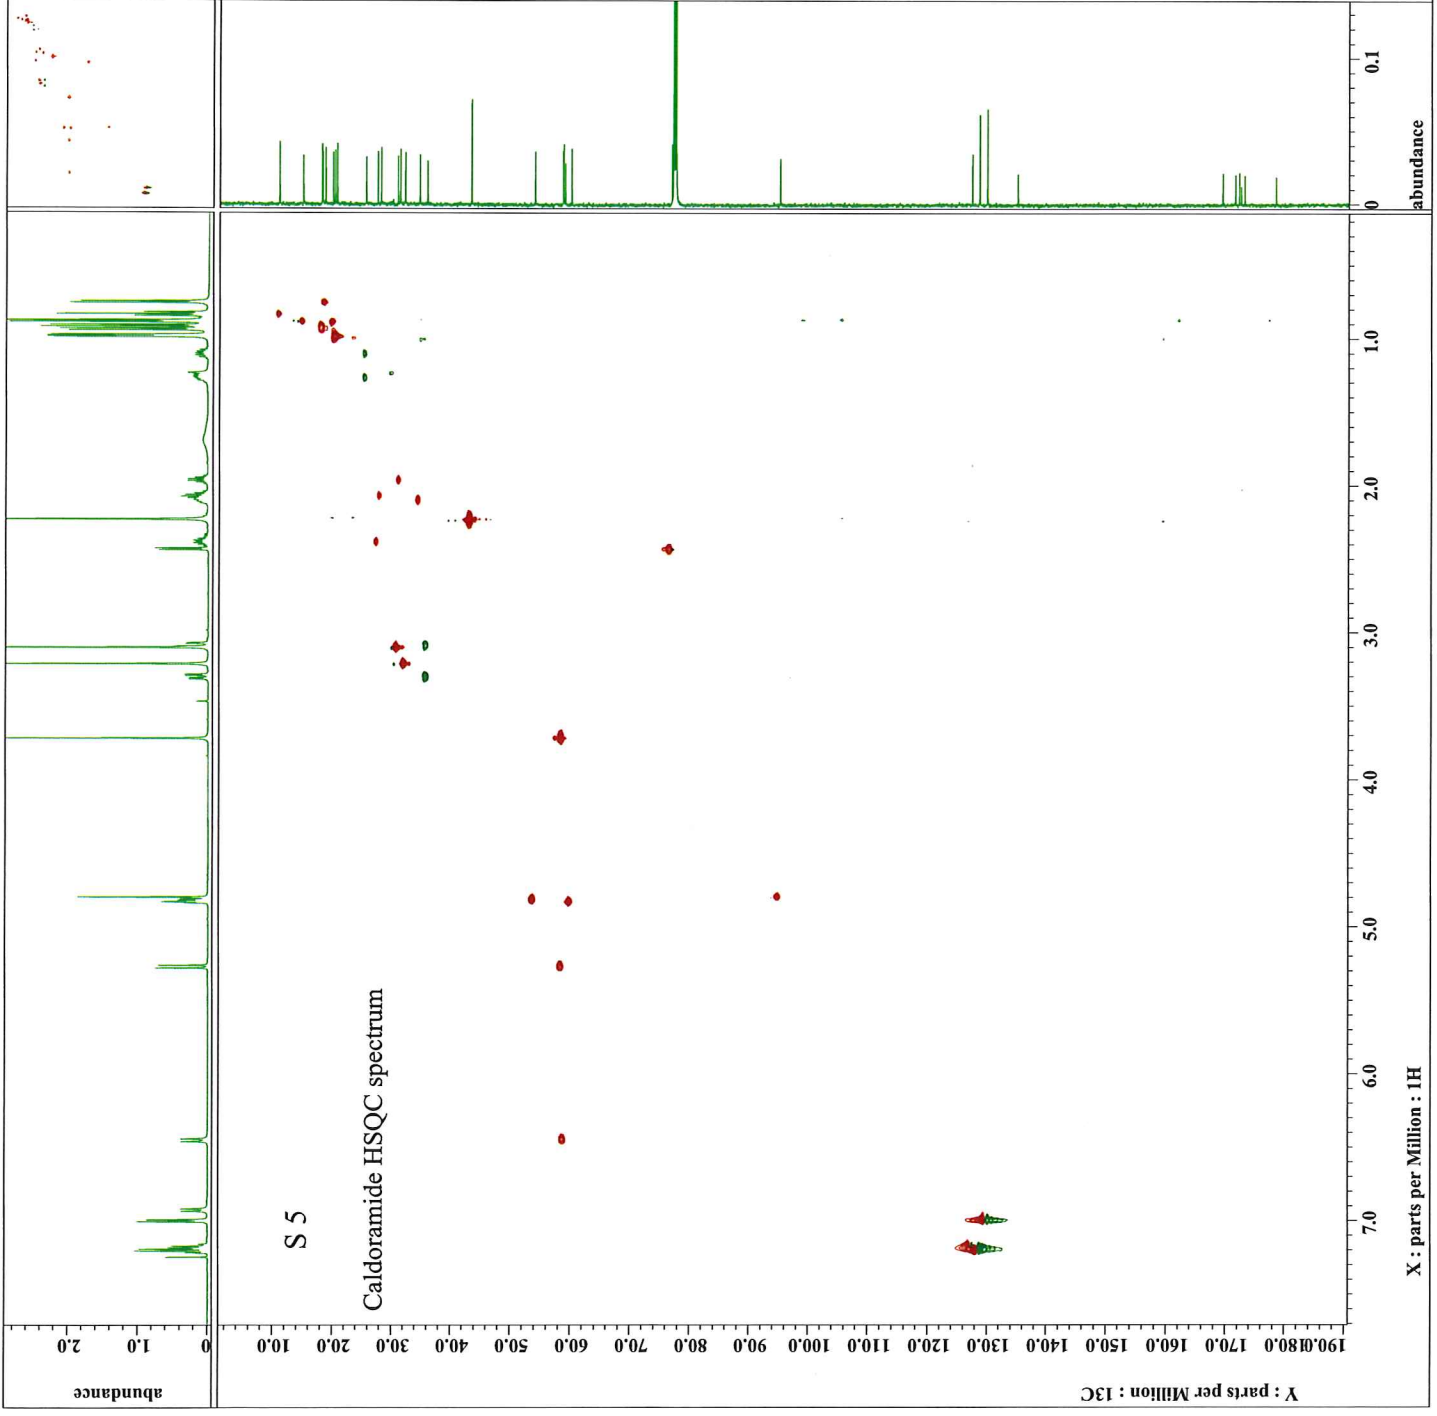

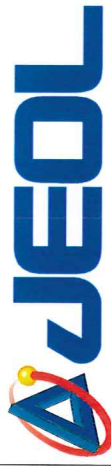

```

---- PROCESSING PARAMETERS ----
Gauss : 5.0 [Hz] : 0.0 [s]
sinbell auto
zerofill : 1
fft : 1 : TRUE : TRUE
ppm
[transpose]
sinbell4 : -60 : 160
trapzoid3 : 5 [%] : 80 [%] : 100 [%]
zerofill : 2
fft : 1 : TRUE : TRUE
ppm
abs
[transpose]

```

```

Filename = cg110-3-cdcl3-hmbc_pf
Author = Smithsonian
Experiment = hmbc pfg.ex2
Sample_id = cg110-3-cdcl3
Solvent = CHLOROFORM-D
Creation_time = 27-JUN-2015 15:32:02
Revision_time = 29-OCT-2015 12:56:26
Current_time = 29-OCT-2015 12:57:39

Comment = Gradient enhanced HMB
Data_format = 2D REAL REAL
Dim_size = 1638, 512
Dim_title = 1H 13C
Dim_units = [ppm] [ppm]
Dimensions = X Y
Site = ECA 600
Spectrometer = ECA600-AID

Field_strength = 14.09636928 [T] (600 [M
X_acq_duration = 0.360448 [s]
X_domain = 1H
X_freq = 600.1723046 [MHz]
X_offset = 3.91786 [ppm]
X_points = 2048
X_prescans = 4
X_resolution = 2.77432528 [Hz]
X_sweep = 5.68181818 [kHz]
Y_domain = 13C
Y_freq = 150.91343039 [MHz]
Y_offset = 95.63986 [ppm]
Y_points = 256
Y_prescans = 0
Y_resolution = 111.99111239 [Hz]
Y_sweep = 28.66972477 [kHz]
Tri_domain = 1H
Tri_freq = 600.1723046 [MHz]
Tri_offset = 5 [ppm]
Clipped = FALSE
Mod_return = 1
Scans = 64
Total_scans = 16384

X_acq_time = 0.360448 [s]
X_atn = 2 [dB]
X_pulse = 7.5 [us]
Y_acq_time = 8.92928 [ms]
Y_atn = 2 [dB]
Y_pulse = 14.7 [us]
Tri_mode = Off
Dante_presat = FALSE
Delta = 62.5 [ms]
Grad_1 = 1 [ms]
Grad_1_amp = 0.18 [T/m]
Grad_2 = 1 [ms]

```

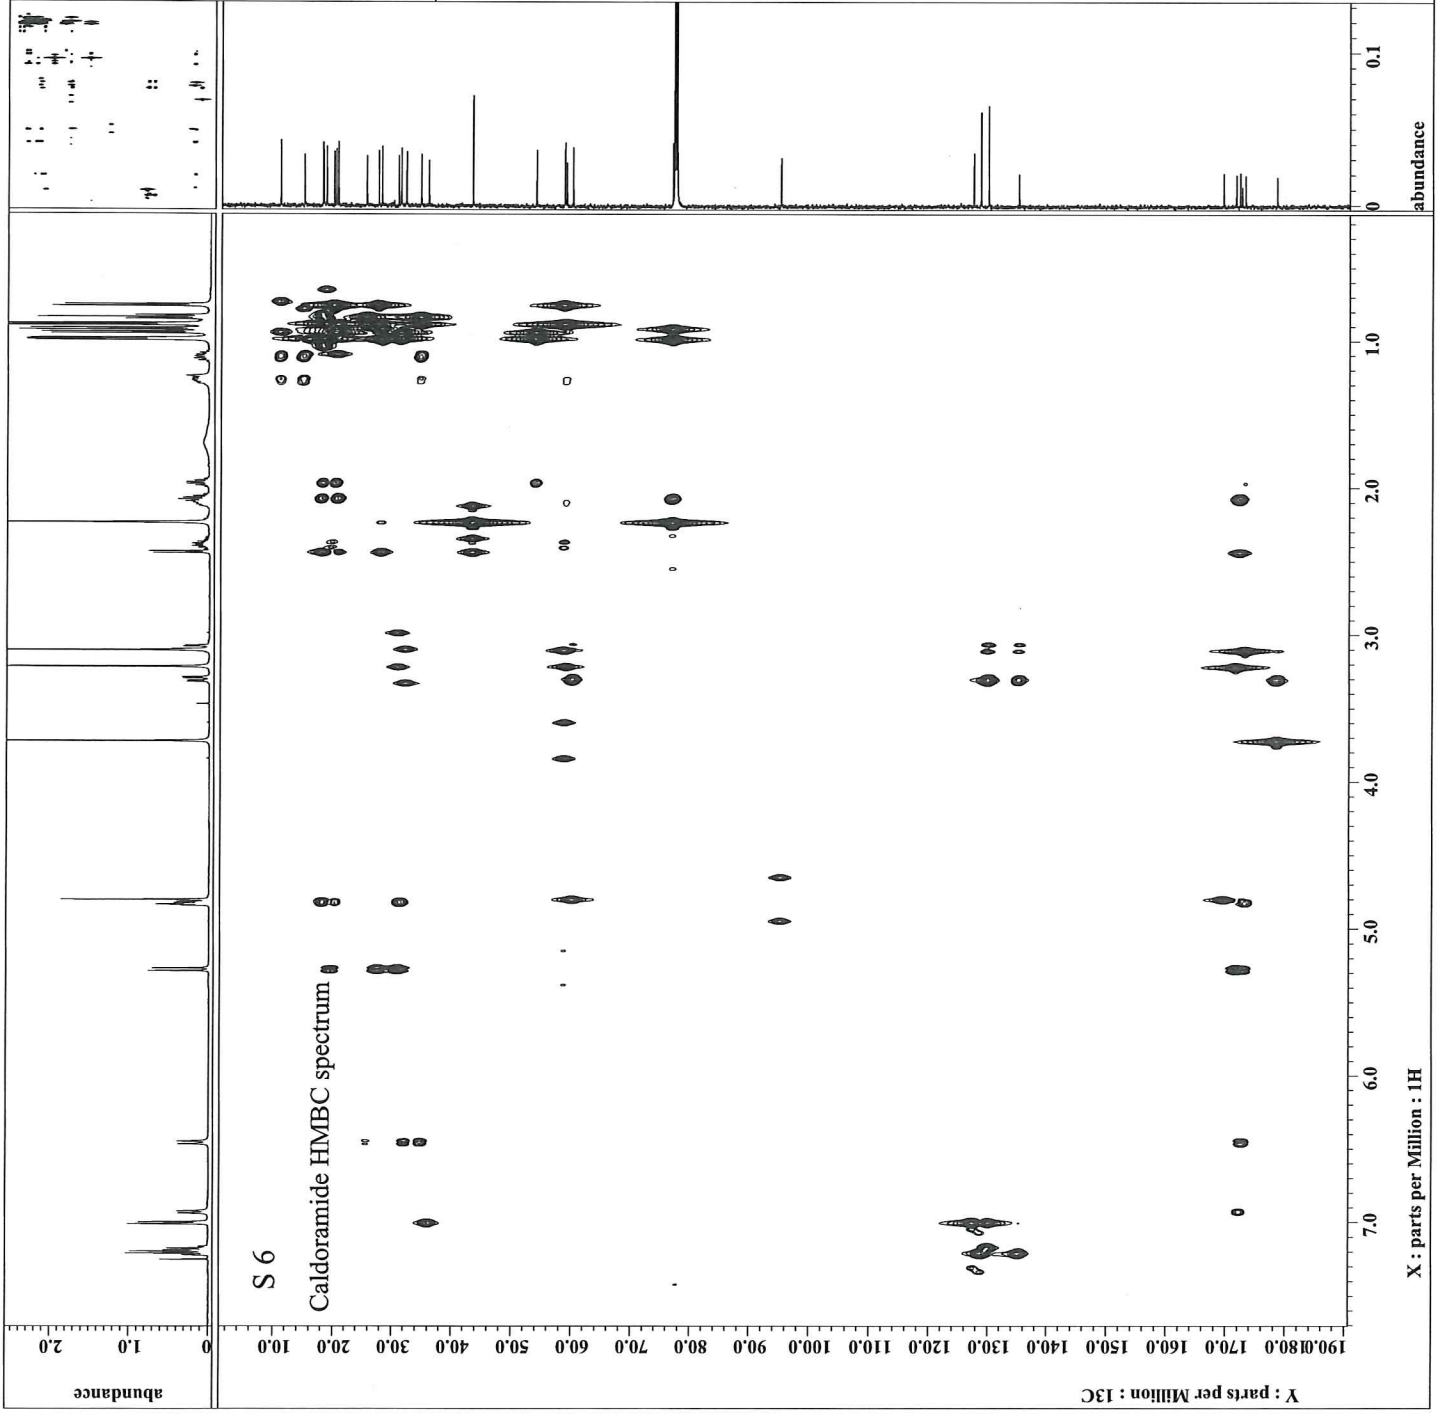

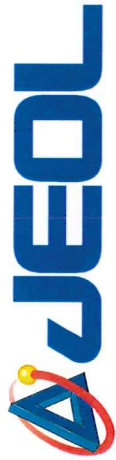

---- PROCESSING PARAMETERS ----  
sexp : 5.0 [Hz] : 0.0 [s]  
trapezoid3 : 0 [%] : 80 [%] : 100 [%]  
zerofill : 1  
fft : 1 : TRUE : TRUE  
ppm  
machinephase  
[trapezoid]  
sexp : 5.0 [Hz] : 0.0 [s]  
trapezoid3 : 0 [%] : 80 [%] : 100 [%]  
zerofill : 2  
fft : 1 : TRUE : TRUE  
ppm  
machinephase

File name = cg110-3a-noesy\_phase\_  
Author = Smithsonian  
Experiment = noesy\_phase\_pfgz  
Sample id = cg110-3a  
Solvent = CHLOROFORM-D  
Creation time = 8-JUL-2015 13:18:38  
Revision\_time = 29-OCT-2015 13:03:20  
Current\_time = 29-OCT-2015 13:04:22

Comment = phase sensitive noesy  
Data format = 2D COMPLEX COMPLEX  
Dim size = 819, 512  
Dim title = 1H 1H  
Dim units = [ppm] [ppm]  
Dimensions = X Y  
Site = ECA 600  
Spectrometer = ECA600-AID

Field strength = 14.09636928 [T] (600 [M]  
X\_acq\_duration = 0.20037632 [s]  
X\_domain = 1H  
X\_freq = 600.1723046 [MHz]  
X\_offset = 3.93305 [ppm]  
X\_points = 1024  
X\_prescans = 4  
X\_resolution = 4.99060967 [Hz]  
Y\_sweep = 5.1103843 [kHz]  
Y\_domain = 1H  
Y\_freq = 600.1723046 [MHz]  
Y\_offset = 3.93305 [ppm]  
Y\_points = 256  
Y\_prescans = 0  
Y\_resolution = 15.9660345 [Hz]  
Y\_sweep = 4.08730483 [kHz]  
Y\_domain = 1H  
Y\_freq = 600.1723046 [MHz]  
Y\_offset = 5 [ppm]  
Clipped = TRUE  
Mod return = 1  
Scans = 32  
Total\_scans = 8192

X\_acq\_time = 0.20037632 [s]  
X\_atn = 2 [dB]  
X\_pulse = 7.5 [us]  
Y\_acq\_time = 62.63296 [ms]  
Y\_pi\_correction = 180  
Y\_mode = Off  
Tri\_mode = Off  
Dante\_preset = FALSE  
Grad\_1 = 1 [ms]

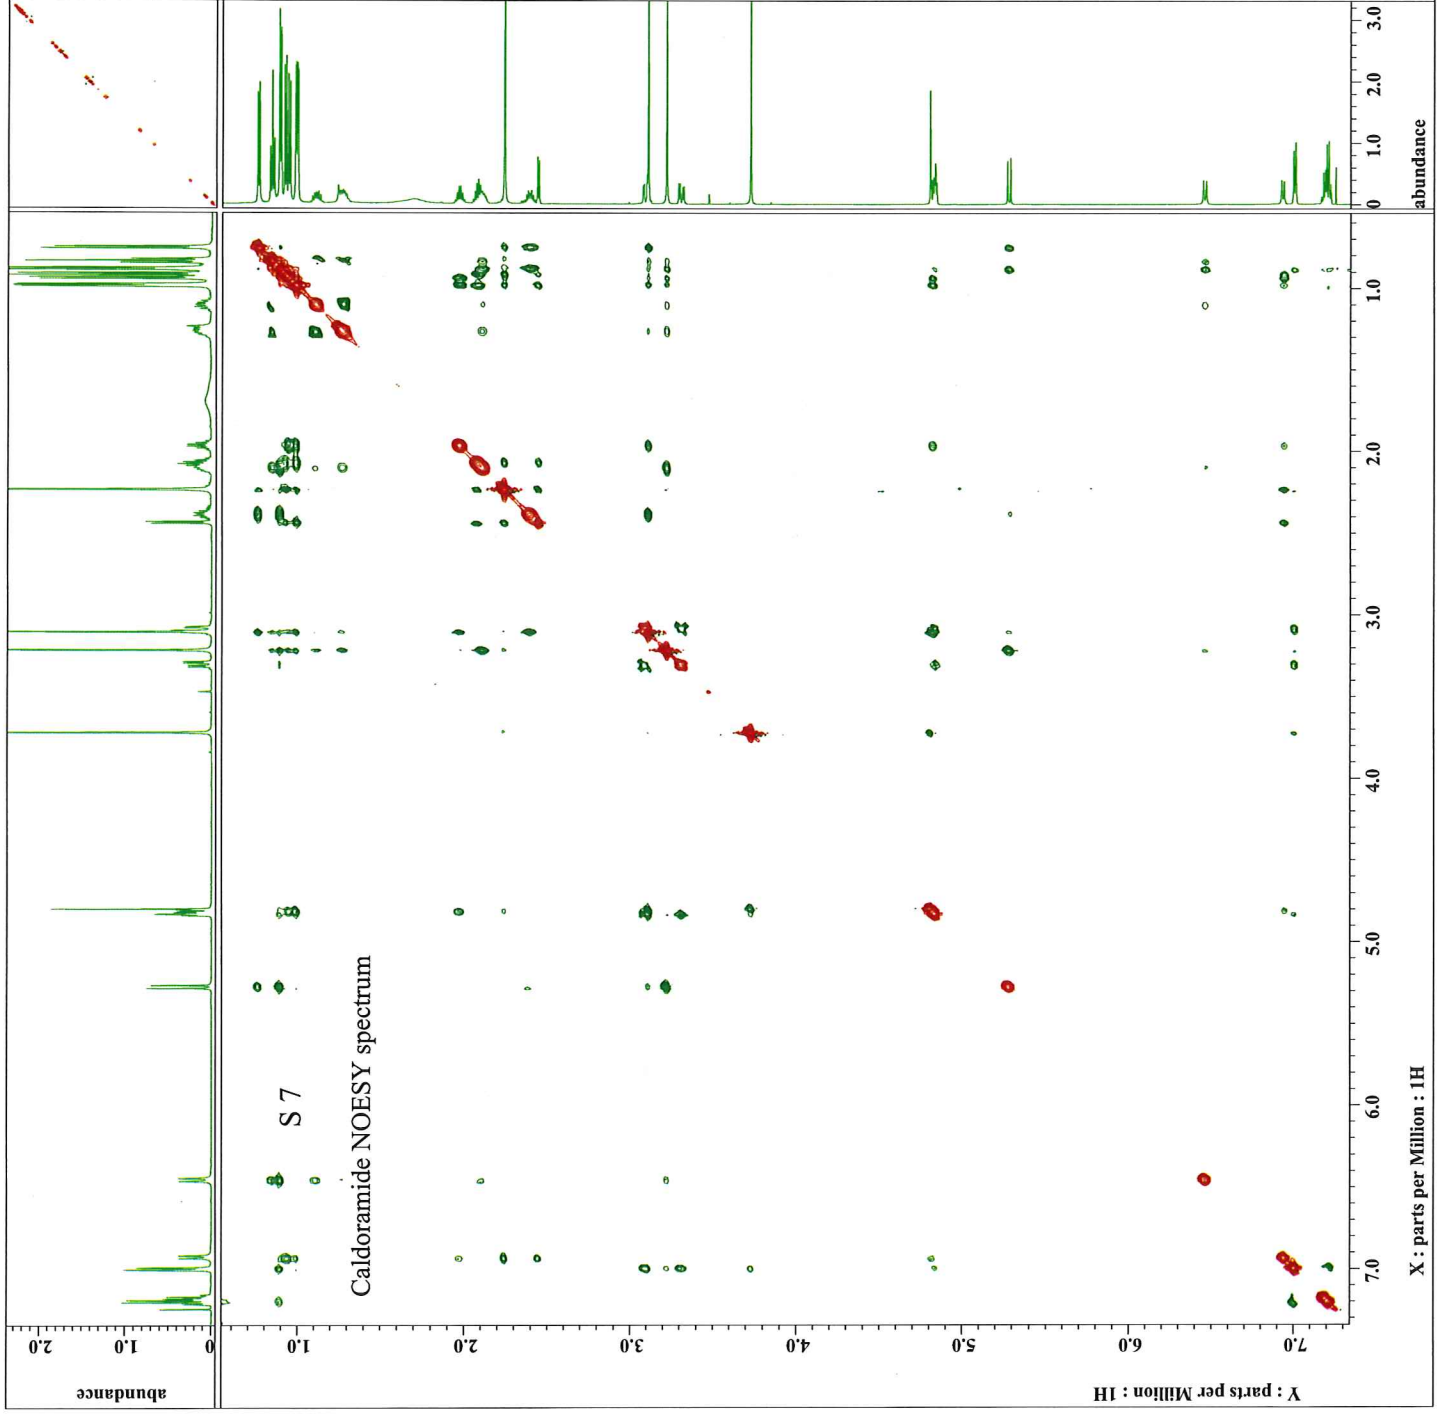

Supplement: NIHMS837764-supplement-Supporting_Information.pdf [file NIHMS837764-supplement-Supporting_Information.pdf]
